# Supplementary material for: Historical mercury losses from the gold mines of Victoria, Australia
Source: Oxford University Press journal article supplement (doi:10.1525/elementa.432), 2020-01-01
Supplement: elementa-8-432-s1.xlsx [file elementa-8-432-s1.xlsx]

## Sheet: annual
Pyrites
year	tons	1.01605	tonnes		references
1869-1886	124245				MSV 1895 for 1896:10
1869	1400		1422.46		MSV 1869 for 1870:11
1870	3180		3231.03		MSV 1870 for 1871:30
1871	3562		3619.16		MSV 1871 for 1872:8
1872	5008		5088.36		MSV 1872 for 1873:8
1873	5568		5657.34		MSV 1873 for 1874:8
1874	6725		6832.91
1875	7499		7619.33
1876	7057		7170.24
1877	7359		7477.08
1878	5375		5461.25
1879	5304		5389.11
1880	8038		8166.98
1881	5967		6062.75
1882	6958		7069.65
1883	7675		7798.15
1884	7087		7200.72
1885	14521		14754
1886	6533		6637.83
1887	4541		4613.86
1888	4881		4959.32
1889	5279		5363.71		MSV 1889 for 1890:104
1890	5560		5649.22		MSV 1890 for 1891:111
1891	5789		137244		MSV 1891 for 1892:106
1892	6717				MSV 1892 for 1893:12
1893	5507				MSV 1893 for 1894:12
1894	5865				MSV 1894 for 1895:14
1895	5181				MSV 1895 for 1896:10
1896
1897
1898
1899
1900
1901
1902
1903
1904
1905
1906
1907
1908
1909
1910
1911
1912
1913
1914	9936				MSV 1914 for 1915:16

## Sheet: pyrites works
year	pyrites works
1869
1870
1871
1872
1873
1874
1875
1876	34
1877	37
1878	45
1879	43
1880	41
1881	46
1882	47
1883	38
1884	32
1885	33
1886	27
1887	25
1888	26
1889
1890

## Sheet: districts + divisions
pyrites tons per year	1869	1870	1871	1872	1873	1874	1875	1876	1877	1878	1879	1880	1881	1882	1883	1884	totals
Ballarat																		1.01605
Central	98	408	192	145	154	145	153	108	103	220	65	2200	285	687	696	413	6072		6169.43
Buninyong				19										11	161		191		194.065
Smythesdale		7		20													27		27.4332
Creswick	576	1048	1338	1206	1048	678	492	634	738	745	752	711	667	246			10879		11053.6
Clunes														283	493	400	1176		1194.87
Gordon													55	119	32	7	213		216.418
Steiglitz	37	8				5	195	201	247	443	430	527	706	762	563	626	4750		4826.22
Blackwood	4	37			60	5	150	96	70	29	39	42	34	11	31	17	625		635.029
Beechworth
Beechworth		12		40		65	82	56	40	91	39	17	51				493		500.911
Yackandandah Sth			1	102	114	231		78	322	159	104	63					1174		1192.84
Wandiligong										164	113	165	185	100		112	839		852.463
Buckland	51	49	180	212	215	162	164	242	568			31	159	125	31		2189		2224.12
Alexandra									1								1
Gaffneys Creek					46	8	24		4	16							98		99.5725
Woods Point		1	73	14	16	21		77	21								223		226.578
Jamieson						10											10
Mitta Mitta Nth														9	71	379	459		466.365
Bethanga														233	270	3	506		514.119
Sandhurst
Sandhurst	465	1030	1460	2557	2939	3621	5174	4986	3306	2639	2980	3652	2900	3581	3443	2647	47380		48140.3
Eaglehawk															1209	1660	2869		2915.04
Heathcote				7				50	144		56	7					264		268.236
Inglewood														2		92	94		95.5083
Waranga Nth					14												14
Maryborough
Maryborough	23	24	23	14	54	580	1	8	13	2	33	13					788		800.644
Dunolly Tarnagulla			23	102				1	1		15		5			6	153		155.455
Redbank St Arnaud Sth	8	377	90	98	82	20		10	1207								1892		1922.36
St Arnaud North		7		7	238	289	390	20					240		12		1203		1222.3
Castlemaine
Castlemaine					245	295	303	168	356	462	461	445	502	455	418	472	4582		4655.52
Fryers Creek	2													125	42	37	206		209.305
Hepburn	28	54	19	11	12	103	89	35	125	53	22	65	111	118	165	204	1214		1233.48
Taradale + Kyneton								4			10						14
St Andrews											3	34	9			9	55
Tarrangower		2	68	22						128				30			250		254.012
Blue Mountain Nth															10		10
Ararat	0	0	0	0	0	0	0	0	0	0	0	0	0	0	0	0
Gippsland
Crooked River		7		5	7												19
Stringers Creek	107	108	93	424	317	485	279	231	125	221	178	65	55	58	25		2771		2815.46
Aberfeldy								50									50
Bendoc					4												4

## Sheet: Districts
	1869	1869	1870	1870	1871	1871
	pyrites tons	gold ozs	pyrites tons	gold ozs	pyrites tons	gold ozs
Ballarat
Beechworth
Sandhurst
Maryborough
Castlemaine
Ararat
Gippsland
